# Supplementary material for: Globally Important Haptophyte Algae Use Exogenous Pyrimidine Compounds More Efficiently than Thiamin
Source: PubMed Central journal article supplement (PMC5635689; doi:10.1128/mbio.01459-17), 2017-10-10

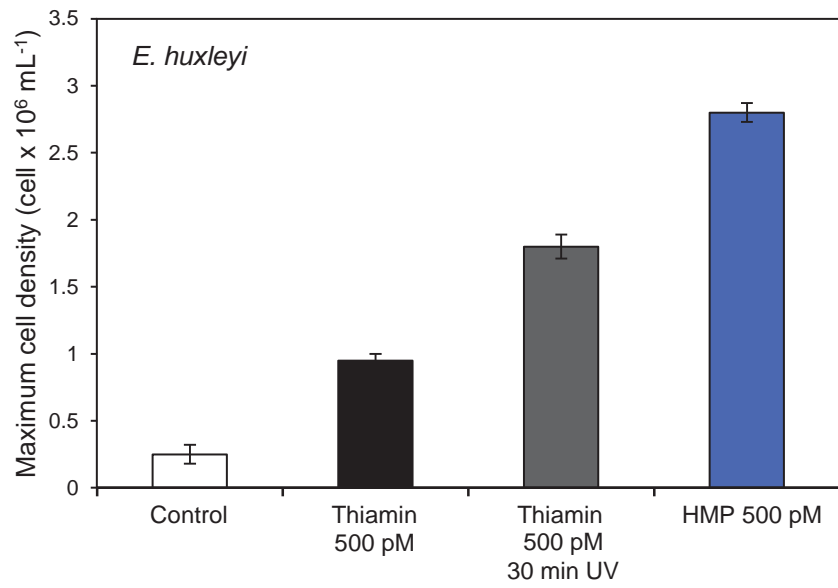

Supplement: mbo005173506sf4.pdf [file mbo005173506sf4.pdf]
